# Supplementary material for: A phase II study in advanced cancer patients to evaluate the early transition to palliative care (the PREPArE trial): protocol study for a randomized controlled trial
Source: Springer Nature journal article supplement (doi:10.1186/s13063-015-0655-8), 2015-04-11
Supplement: MOESM1 [file 9781952]

## Additional file 1

### Disease awareness protocol

The following questions will assess your awareness of the disease that you are being treated for at this hospital. Please be honest and answer what you really think.

1. In your opinion, is your illness (your cancer) curable?

Yes  No

2. What are the goals of your treatment:

*You may mark as many answers as you feel appropriate.*

- |                                    |                              |                             |
|------------------------------------|------------------------------|-----------------------------|
| a. To help you live longer         | Yes <input type="checkbox"/> | No <input type="checkbox"/> |
| b. To make you feel better         | Yes <input type="checkbox"/> | No <input type="checkbox"/> |
| c. To completely cure your disease | Yes <input type="checkbox"/> | No <input type="checkbox"/> |
